# Supplementary material
Source: MDPI journal article supplement (https://www.mdpi.com/2072-4292/7/5/6454)
Supplement: s1 [file s1]

**High-Resolution Precipitation Datasets in South America and West Africa based on Satellite-Derived Rainfall, Enhanced Vegetation Index and Digital Elevation Model**

**Supplementary:** <http://www.aquaknow.net/en/document/high-resolution-precipitation-datasets-south-america-and-west-africa-based-satellite-derived-rainfal>
